# Supplementary material
Source: Springer Nature journal article supplement (https://www.springermedizin.de/resource/supplementary/13002_2010_201_MOESM6_ESM.pdf/9627376)

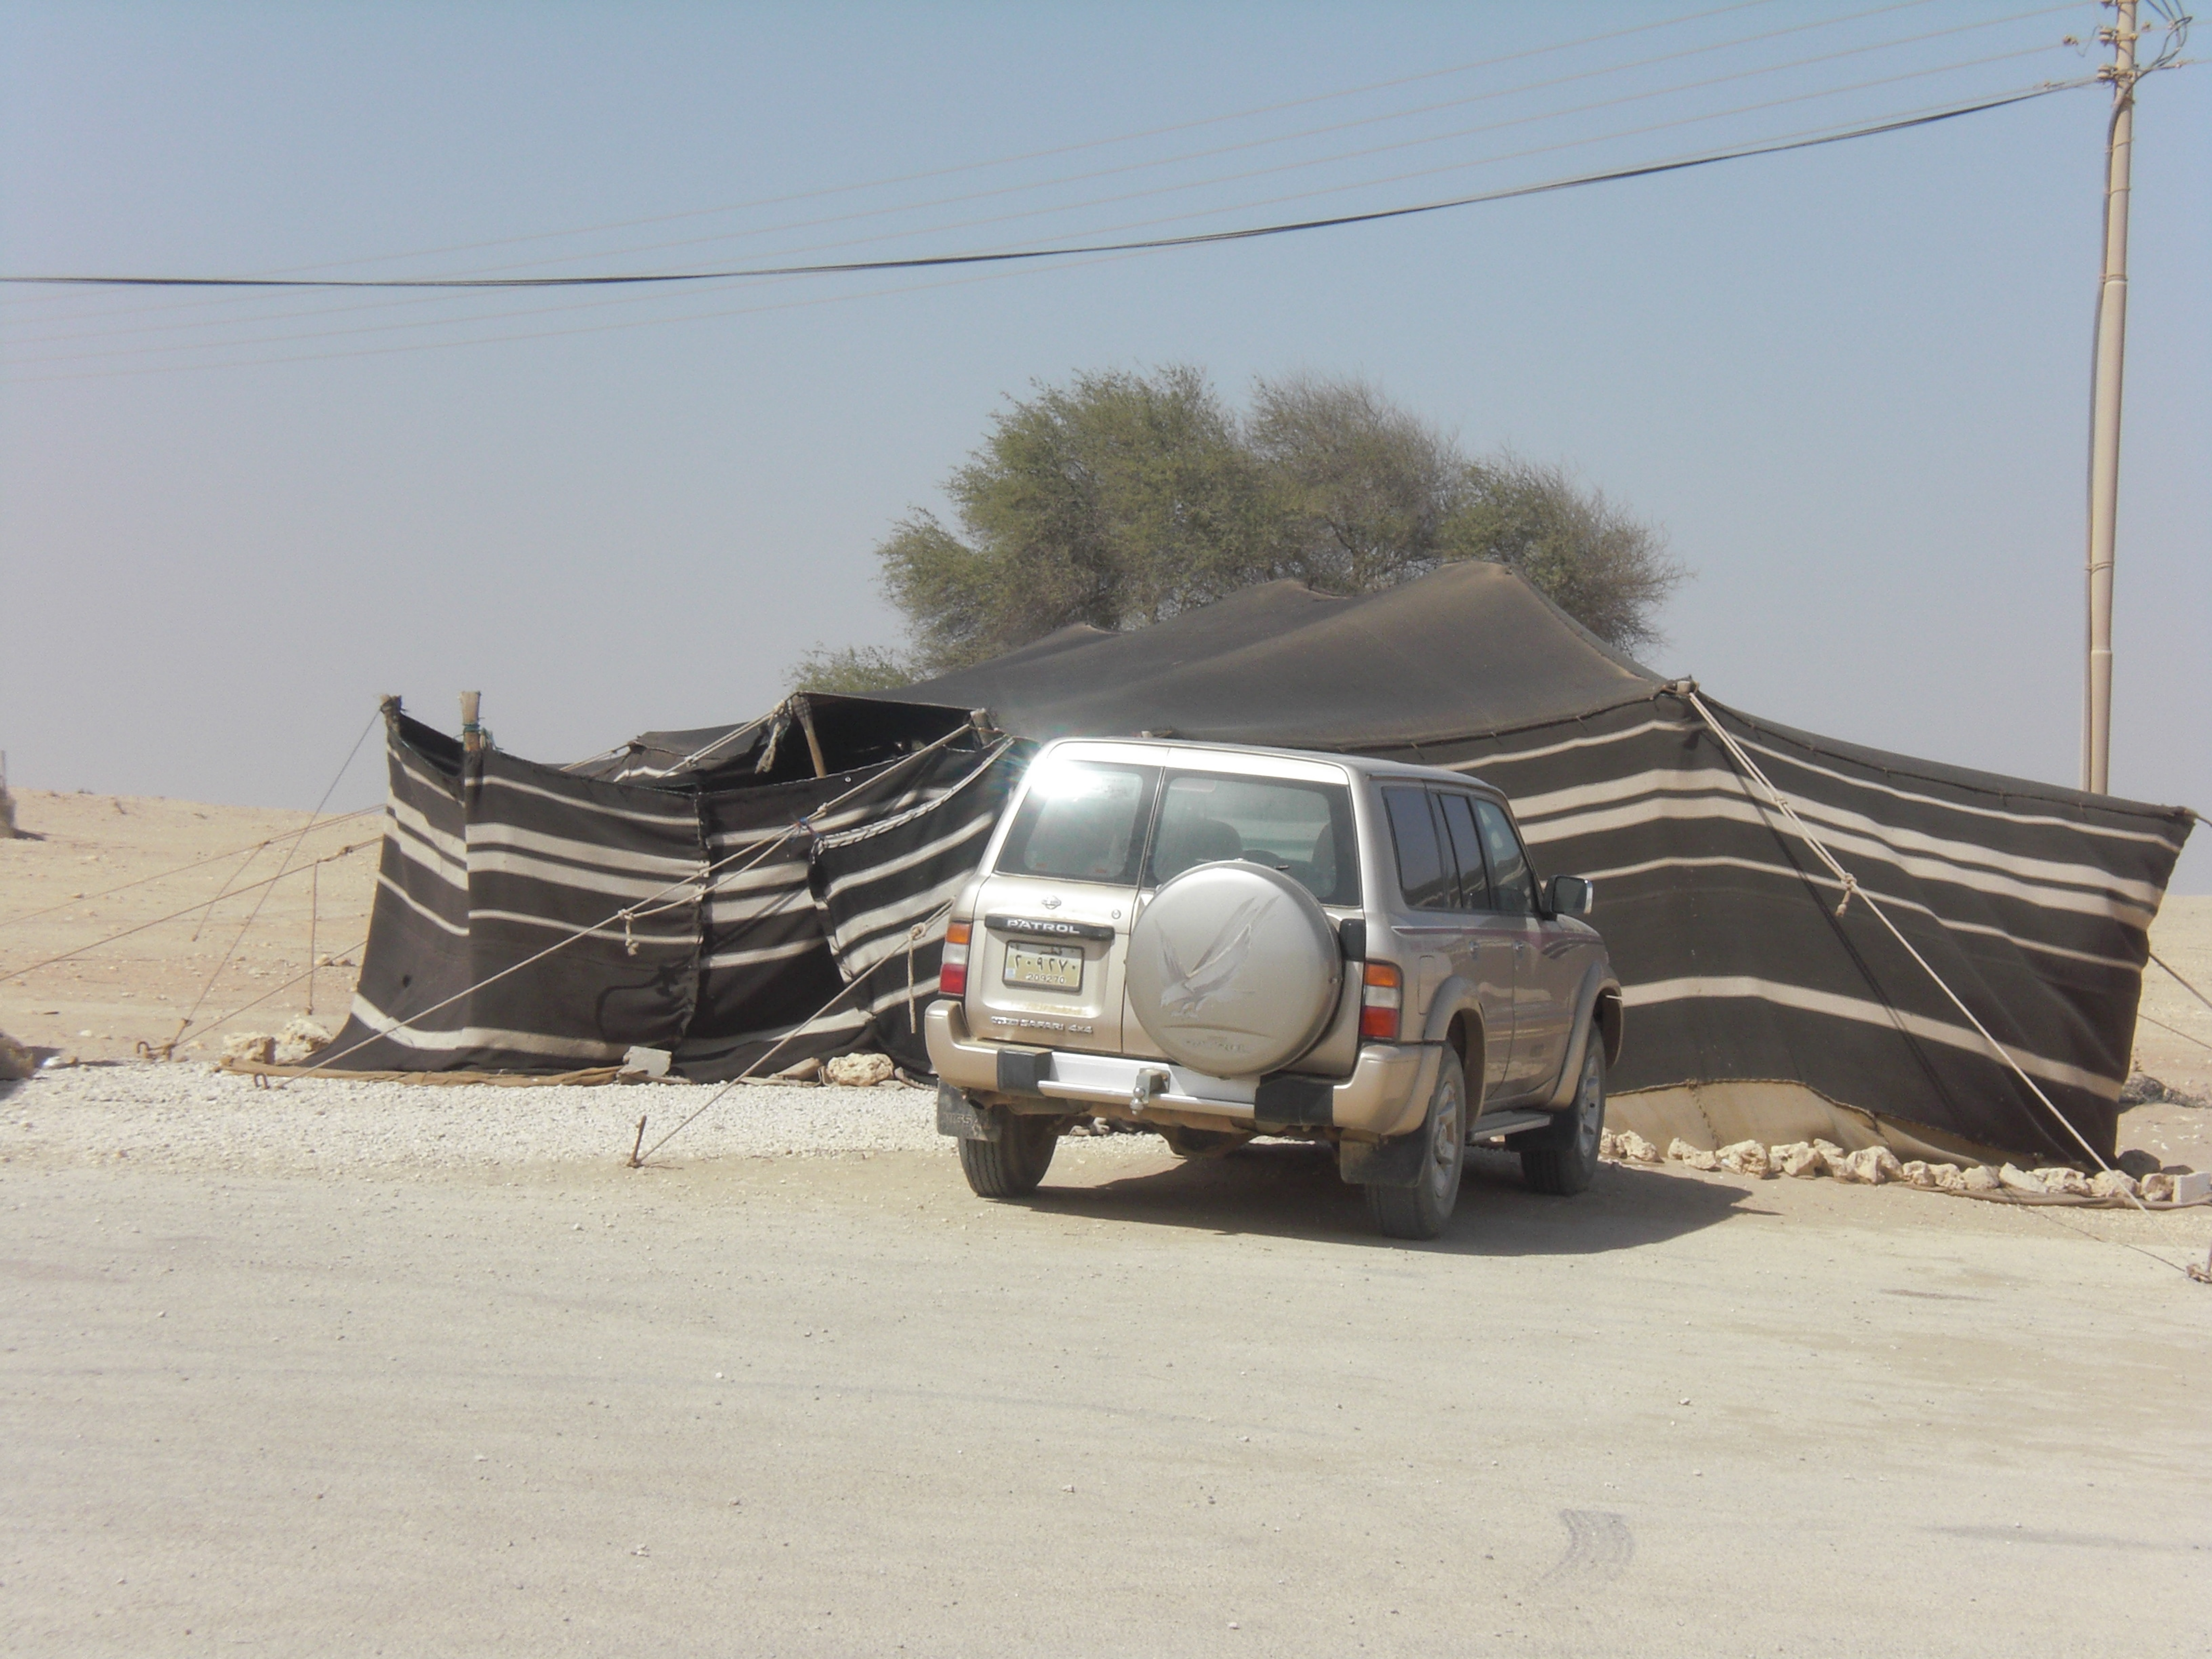

PATROL  
٢٠٩٢٧٠  
209270  
NISSAN  
4x4

Supplement: MOESM6 [file 9627376]
